# Linear Loss of Insulin Secretory Capacity During the Last Six Months Preceding IDDM

## No effect of antiedematous therapy with ketotifen

KIRSTEN P. BÖHMER, MD  
HUBERT KOLB, PHD  
BERND KUGLIN, MD  
JÜRGEN ZIELASEK, MD  
ACHIM HÜBINGER, MD  
EBERHARD F. LAMPETER, MD

BRUNO WEBER, MD  
VICTORIA KOLB-BACHOFEN, PHD  
H.U. JASTRAM, MD  
JÖRG BERTRAMS, MD  
F. ARNOLD GRIES, MD

**OBJECTIVE**— To investigate the effect of an antiedematous therapy with the histamine antagonist ketotifen on  $\beta$ -cell function in late prediabetes.

**RESEARCH DESIGN AND METHODS**— In a randomized double-blind placebo-controlled study, ketotifen was administered for 3 months to 9 islet cell antibody positive (ICA<sup>+</sup>) prediabetic patients with a first-phase insulin response (FPIR) below the 2.5th percentile to preserve residual  $\beta$ -cell function. Patients were followed by intravenous glucose tolerance tests (IVGTTs) every 4–6 weeks for determination of FPIR, HbA<sub>1c</sub>, ICAs, and insulin autoantibodies. In 5 patients, the immune activation state was followed by determination of serum levels of tumor necrosis factor- $\alpha$  (TNF- $\alpha$ ),  $\beta_2$ -microglobulin, and C-reactive protein (CRP).

**RESULTS**— Seven of nine patients developed diabetes within one year of follow-up. Irrespective of treatment with ketotifen, a slow and linear decline ( $P < 0.05$ ) of 1 + 3-min insulin values was observed in sequential IVGTTs in those 7 patients who developed insulin-dependent diabetes mellitus (IDDM) during follow-up. The 2 other patients showed wide fluctuations of the insulin response with a threefold increase of initial insulin levels. HbA<sub>1c</sub> did not correlate with FPIR. Fasting blood glucose increased significantly during the study ( $P < 0.05$ ). Individual levels of serum TNF- $\alpha$ , CRP, and  $\beta_2$ -microglobulin did not change during the study.

**CONCLUSIONS**— The study could not demonstrate preservation of  $\beta$ -cell function by ketotifen in the late stage before manifestation of clinical diabetes. Manifestation is preceded in the last 6 months by a steady loss of the FPIR without rapid deterioration immediately before diagnosis and without signs of increased immune activity.

From the Diabetes Research Institute at the University of Düsseldorf, Düsseldorf (K.P.B., H.B., B.K., J.Z., A.H., E.F.L., F.A.G.); Department of Pediatrics, University of Berlin, Berlin (B.W.); Department of Pediatrics, City Hospital, Kaiserslautern (H.U.J.); Elisabeth Hospital, Essen (J.B.); Institute for Immunobiology, University of Düsseldorf, Düsseldorf, Germany (V.K.B.).

Address correspondence and reprint requests to Kirsten P. Böhrer, MD, Diabetes Research Institute at the University of Düsseldorf, Auf'm Hennekamp 65, 40225 Düsseldorf, Germany.

Received for publication 10 November 1992 and accepted in revised form 7 August 1993.

IDDM, insulin-dependent diabetes mellitus; ICA, islet cell antibody; FPIR, first-phase insulin response; IVGTT, intravenous glucose tolerance test; IAA, insulin autoantibodies; TNF- $\alpha$ , tumor necrosis factor- $\alpha$ ; CRP, C-reactive protein; IRI, immunoreactive insulin; JDF U, Juvenile Diabetes Foundation units; HLA, human leukocyte antigen.

In general, the manifestation of insulin-dependent diabetes mellitus (IDDM) appears to be preceded by a long pre-clinical phase characterized by islet-specific autoimmune phenomena and some deterioration of  $\beta$ -cell function (1,2). This has led to earlier attempts of an immune intervention therapy before the onset of the disease by immunosuppression (3,4), immunomodulation (5), and improving  $\beta$ -cell regeneration (6,7). The therapeutic approach described herein was based on the observation of vascular leakage in inflamed islets of animal models such as the BB rat (8) as well as the low-dose streptozocin diabetes mouse model (9,10). In the latter, an antiallergic therapy with a serotonin/histamine antagonist (pizotifen) administered before the development of insulinitis has been shown to suppress macrophage and T-cell infiltration and prevent diabetes manifestation (11). Therefore, we decided to investigate the effect of the well-established (12) histamine antagonist ketotifen on residual  $\beta$ -cell function in pre-IDDM. To treat only patients with a very high risk of developing diabetes, we included only normoglycemic islet cell antibody positive (ICA<sup>+</sup>) individuals with an first-phase insulin response (FPIR) (1 + 3-min insulin value) to intravenous glucose below the 2.5th percentile.

## RESEARCH DESIGN AND METHODS

We studied 9 ICA<sup>+</sup> individuals (mean age  $12 \pm 8.4$  years). The individual patient data are given in Table 1. All patients or their parents gave written, informed consent and underwent at least two intravenous glucose tolerance tests (IVGTTs) and determination of ICAs before the study. The inclusion criteria were as follows: absence of overt diabetes according to World Health Organization criteria (13), ICA titers  $\geq 20$  Juvenile Diabetes Foundation units (JDF U), FPIR (IVGTT 1 + 3-min values) below the 2.5th percentile on repeated testing, and genetic predisposition (hu-

Table 1—Individual patient data of all patients in the ketotifen study

| Patient | Age (years) | Sex | HLA-DR | Treatment | Reasons for ICA test      | ICA titer (JDF U) | Fasting blood glucose at study entry (mM) | Cause of study termination | Days to diabetes |
|---------|-------------|-----|--------|-----------|---------------------------|-------------------|-------------------------------------------|----------------------------|------------------|
| A       | 3           | F   | 3,4    | Placebo   | Diabetic siblings         | 40                | 4.1                                       | End of study               | —                |
| B       | 18          | M   | 7,w8   | Verum     | Diabetic sibling          | 20                | 3.8                                       | End of study               | —                |
| C       | 31          | F   | 3,4    | Verum     | Diabetic sibling          | 320               | 4.4                                       | Blood glucose > 11.1 mM    | 139              |
| D       | 8           | M   | 3,4    | Placebo   | High normal blood glucose | 80                | 4.8                                       | Blood glucose > 11.1 mM    | 148              |
| E       | 8           | F   | 4      | Verum     | High normal blood glucose | 80                | 5.8                                       | Blood glucose > 11.1 mM    | 183              |
| F       | 12          | F   | 4      | Placebo   | High normal blood glucose | 160               | 4.4                                       | Blood glucose > 11.1 mM    | 181              |
| G       | 8           | F   | 3,4    | Verum     | High normal blood glucose | 40                | 4.0                                       | End of study               | 209              |
| H       | 6           | F   | 3,4    | Placebo   | High normal blood glucose | 40                | 3.6                                       | Blood glucose > 11.1 mM    | 98               |
| I       | 14          | M   | 4      | Verum     | High normal blood glucose | 20                | 5.6                                       | End of study               | 209              |

High-normal blood glucose is defined as  $6.7 \text{ mM} \leq \text{random capillary blood glucose} \leq 8.3 \text{ mM}$ .

man leukocyte antigen [HLA]-DR3 and/or HLA-DR4, and/or HLA identity to a sibling with IDDM). After randomization, all patients received 2 mg of slow-release ketotifen (Sandoz AG, Basel, Switzerland) or placebo daily during the first 2 weeks in a double-blinded fashion. Thereafter, the dose was increased to  $2 \times 2 \text{ mg}$  ketotifen or placebo per day in patients 14 years of age or older. Medication was discontinued after 3 months. Patients were followed for an additional 3 months without medication. IVGTTs were performed before medication and after 1, 2, 3, 4.5, and 6 months. Before each IVGTT, blood was drawn for determination of various immunological and metabolic parameters (see below). Sera were aliquoted and stored at  $-20^{\circ}\text{C}$ .

All sera were tested for ICAs or insulin autoantibodies (IAAs) in one single assay to avoid interassay variation. ICAs were determined by immunofluorescence, and IAAs were determined with a fluid-phase radioimmunoassay as described previously (14,15). Our laboratory participates in the worldwide ICA proficiency test (16); the specificity was rated as 100%. A complete set of sera was available in 5 patients for the detection of tumor necrosis factor- $\alpha$  (TNF- $\alpha$ ),  $\beta_2$ -microglobulin, and C-reactive protein (CRP). TNF- $\alpha$ ,  $\beta_2$ -microglobulin, CRP, HLA typing, immunoreactive insulin

(IRI), blood glucose, and HbA<sub>1c</sub> were determined by standard laboratory methods.

The IVGTT was performed after an overnight fast between 0730 and 1000. Glucose (20%) (0.5 mg/kg body weight; maximum 35 g glucose) was given manually through an indwelling intravenous cannula within 3 min. Blood was drawn for measurement of IRI and C-peptide at 0, 1, 3, 5, 10, and 20 min after the termination of glucose infusion.

The percentile of the 1 + 3-min insulin value was determined according to the IVGTTs of 100 healthy control subjects (17).

### Statistical analysis

$P < 0.05$  was considered statistically significant. Where applicable, we used Wilcoxon's rank test for between-group comparisons. Data are presented as means  $\pm$  SD. Statistical analyses were

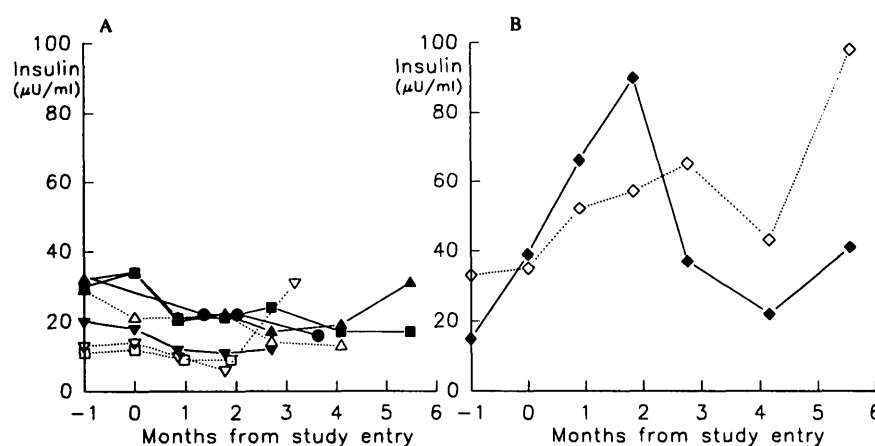

**Figure 1**—IVGTT: FPIR (1 + 3-min values) during the ketotifen study for patients who developed diabetes (A) and those who did not develop diabetes (B). Each symbol represents one patient. (---), Patients with placebo; (—), patients with ketotifen. Patient symbols according to letters used in Table 1: (◇), patient A; (◆), patient B; (▼), patient C; (▽), patient D; (●), patient E; (△), patient F; (■), patient G; (□), patient H; and (▲), patient I.

performed using the SAS software package (SAS Institute, Cary, NC).

**RESULTS**— The IVGTT results of all patients are given in Fig. 1. For follow-up analysis, patients were divided into two groups, those who developed IDDM ( $n = 7$ ) (Fig. 1A) and those who remained normoglycemic during further follow-up at 14 and 54 months ( $n = 2$ ) (Fig. 1B). No difference could be detected in 1 + 3-min insulin values between the verum and placebo group ( $\beta = 0.80$ ). Considering the 95% confidence interval for the observed difference between the verum and placebo groups, it is most unlikely that a clinically significant difference between the groups would have been detected, even with large numbers of patients. In all patients who later developed diabetes, a significant ( $P < 0.05$ ) decline in FPIR occurred independent of treatment until manifestation of diabetes. Discontinuation of the test drug had no effect on 1 + 3-min insulin values ( $P < 0.05$ ). Fasting blood glucose levels increased from  $4.7 \pm 0.8$  mM at the beginning of the study to  $5.4 \pm 1.2$  mM at the manifestation of diabetes at the end of the study ( $P < 0.05$ ). The 2 patients who did not progress to diabetes showed major fluctuations of the FPIR (Fig. 1B); 1 of the 2 patients received placebo.

HbA<sub>1c</sub> levels are given in Fig. 2. FPIR correlated negatively to HbA<sub>1c</sub> levels ( $r = -0.33$ ,  $P < 0.02$ ).

ICA titers did not change significantly during the study. IAAs were positive in 3 patients only; their titer fluctuated. No correlation was noted between the decline in FPIR and ICA or IAA titers in patients with high or low titers. Serum TNF- $\alpha$  was elevated ( $>100$  pg/ml) in 4 of 5 patients but did not change during the study. Serum  $\beta_2$ -microglobulin and CRP levels were within the normal range in all patients and remained constant. The following complaints were reported: fatigue (1 patient on verum, 2 patients on placebo), nausea (1 placebo-treated patient), increased appetite (1 verum-

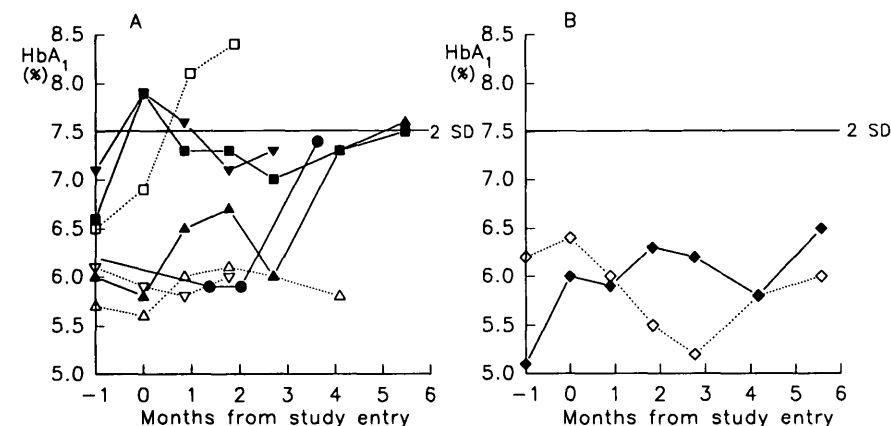

**Figure 2**—HbA<sub>1c</sub> values during the ketotifen study for patients who developed diabetes (A) and those who did not develop diabetes (B). Each symbol represents one patient. (---), Patients with placebo; (—), patients with ketotifen. Patient symbols according to letters used in Table 1: (◇), patient A; (◆), patient B; (▼), patient C; (▽), patient D; (●), patient E; (△), patient F; (■), patient G; (□), patient H; and (▲), patient I.

treated patient). The medication did not have to be interrupted in any of the subjects. All symptoms were resolved immediately after planned discontinuation of the study medication.

**CONCLUSIONS**— The data show that the administration of ketotifen to patients at a late prediabetic state was neither able to restore nor preserve the FPIR to intravenous glucose.

The dosage of 2–4 mg ketotifen daily corresponded to maximum doses given in allergic diseases (12), and in the animal model, 5 mg/kg body weight of pizotifen was able to prevent insulinitis and macrophage infiltration (11). The failure of ketotifen to protect  $\beta$ -cell function may have several reasons. First, the intervention may have started too late. In the animal experiments, the drug was administered before the onset of insulinitis, whereas the patients received ketotifen in a late stage before manifestation of clinical diabetes. Ketotifen may not be able to inhibit or reverse peri-insular edema at a stage where physical damage of the islet vasculature may have occurred. Second, vasoactive amines have been shown to reduce peri-insular edema in animal

models (8–10); however, a relevance of this finding in human diabetes has not yet been shown. Because vascular leakage in the presence of otherwise intact endothelia should quickly be inhibited by ketotifen, a beneficial effect should have been observed within a few weeks. Because our study was unable to show a preservation of  $\beta$ -cell function, we assume that histamine-dependent reversible endothelial changes do not play an important role in advanced islet inflammation in humans. Antiallergic intervention with common doses of ketotifen in late prediabetes thus cannot be encouraged.

Markers of specific islet autoimmunity (ICA, IAA) did not change during the study period. To assess changes in immunological disease activity we measured several markers (TNF- $\alpha$ , CRP,  $\beta_2$ -microglobulin) of general inflammatory processes as well. None of these markers revealed significant changes during the study period. Therefore, we conclude that no evidence exists for an “immunological burst” immediately before the diagnosis of the disease.

This notion is supported by our observation of a slow and steady deteri-

oration of  $\beta$ -cell function as measured by glucose-induced insulin secretion in the patients presented herein. No evidence was found for accelerated deterioration of  $\beta$ -cell function in the last months before the diagnosis of IDDM. On the other hand, the 2 patients who did not develop diabetes had major fluctuations in their FPIR to intravenous glucose. In accordance with the reported high variability of IVGTT results in normal individuals (18), these data show that a prognosis of the course of individual progression to IDDM based on a single IVGTT in ICA<sup>+</sup> individuals is not possible. Our data suggest that the manifestation of clinical diabetes is a slow process and that the point of diabetes manifestation can hardly be distinguished from late prediabetes by the currently available tests of insulin secretion or immunological activity. In contrast to clinical practice, manifestation of IDDM does not appear to be a sharply defined incident, even when assessed by sensitive methods of islet  $\beta$ -cell function and immune reactivity.

In conclusion, we found no evidence for an effect of an antiedematous therapy with ketotifen on insulin secretion in late prediabetes. The progression to insulin dependency seems to be a slow process not predictable by single IVGTT values, and no evidence exists for an accelerated loss of islet  $\beta$ -cell function or increased immunological activity immediately before the diagnosis of insulin dependency.

**Acknowledgments**—This work was supported by the Ministerium für Wissenschaft und Forschung des Landes Nordrhein-Westfalen and the Bundesministerium für Gesundheit. J.Z. was supported by a grant from the Juvenile Diabetes Foundation International.

We thank K. Roßbach and K. Isselmann-Bork for expert technical assistance, Prof. Dr. H. Reinauer and his staff for HbA<sub>1c</sub> and blood glucose analysis, Dipl.-Math. J. Rosenbauer for the statistical analysis, and Dr. J. Schädelin (Sandoz AG, Basel, Switzerland) for providing the medications.

## References

1. Srikanta S, Ganda OP, Soeldner JS, Eisenbarth GS: First-degree relatives of patients with type 1 diabetes mellitus: islet cell antibodies and abnormal insulin secretion. *N Engl J Med* 313:461–64, 1985
2. Johnston C, Millward BA, Hoskins P, Leslie RDG, Bottazzo GF, Pyke DA: Islet cell antibodies as predictors of the later development of type 1 (insulin-dependent) diabetes. *Diabetologia* 32:382–86, 1989
3. Riley W, Mac Laren NK, Spillar RS: Reversal of deteriorating glucose tolerance with azathioprine in prediabetics. *Transplant Proc* 18:819–22, 1986
4. Ganda OP, Srikanta S, Eisenbarth GS: ICA positive relatives of patients with type 1 diabetes mellitus: defective insulin secretion and restoration of first-phase insulin release by low-dose prednisone (Abstract). *Diabetes* 34 (Suppl. 1):85A, 1985
5. Usadel KH, Arndt V, Beyer J, Bicker U, Creutzfeldt W, Dempe A, Eggstein M, Federlin K, Greten H, Gries FA, Henrichs H, Irsigler K, Kaffarnik J, Kampmann B, Stürmer W, Kerp L, Lang PD, Mehnert H, Messinger D, Michaelis D, Otto H, Pfeiffer EF, Sailer D, Sailer S, Schernthaner G, Schmeidl R, Schöffling K, Schröder KE, Schwandt P, Staiger Ch, Vollmar J, Wahl P, Waldhäusl W, Warnatz H, Weinges K, Willms B: Analyse der Wirksamkeit hinsichtlich der Nebenwirkungen von Ciamexon bei der IDDM-Multicenterstudie (Abstract). *Akt Endokr Stoffw* 10:140A, 1989
6. Herskowitz R, Jackson RA: Pilot trial of preventive therapy: progression to overt hyperglycemia by 3/3 "prediabetics" (Abstract). *Diabetes* 37 (Suppl. 1):233A, 1988
7. Elliott RB, Chase HP: Prevention or delay of type 1 (insulin-dependent) diabetes mellitus in children using nicotinamide. *Diabetologia* 34:362–65, 1991
8. Hanenberg H, Kolb-Bachofen V, Kantwerk-Funke G, Kolb H: Macrophage infiltration precedes and is a prerequisite for lymphocyte insulinitis in pancreatic islets of pre-diabetic BB rats. *Diabetologia* 32:126–34, 1989
9. Schwab E, Burkart V, Freytag G, Kiesel U, Kolb H: Inhibition of immune-mediated low-dose streptozotocin diabetes by agents, which reduce vascular permeability. *Immunopharmacology* 12:17–21, 1986
10. Beppu H, Maruta K, Kürner T, Kolb H: Diabetogenic action of streptozotocin: essential role of membrane permeability. *Acta Endocrinol* 114:90, 1987
11. Martin S, Kolb-Bachofen V, Kiesel U, Kolb H: Pathogenesis of low-dose streptozotocin-induced diabetes: requirement for  $\alpha$ 1-adrenoceptor activation and vasoactive amine release. *Diabetologia* 32:140–42, 1989
12. Maclay WP, Crowder D, Spiro S, Turner P: Postmarketing surveillance: practical experience with ketotifen. *Br Med J* 288:911–14, 1984
13. World Health Organization: *Diabetes Mellitus: Report of a WHO Study Group*. Geneva, World Health Org., 1985 (Tech. Rep. Ser. 727)
14. Kolb H, Dannehl K, Grünekle K, Zielasek J, Bertrams J, Hübinger A, Gries FA: Prospective analysis of islet cell antibodies in children with type 1 (insulin-dependent) diabetes mellitus. *Diabetologia* 31:189–94, 1988
15. Böhmer K, Keilacker H, Kuglin B, Hübinger A, Bertrams J, Gries FA, Kolb H: Proinsulin autoantibodies are more closely associated with type 1 (insulin-dependent) diabetes mellitus than insulin autoantibodies. *Diabetologia* 34:830–34, 1991
16. Bonifacio E, Boitard C, Gleichmann H, Shattock MA, Molenaar JL, Bottazzo GF: Assessment of precision, concordance, specificity, and sensitivity of islet cell antibody measurement in 41 assays. *Diabetologia* 33:731–36, 1990
17. Kuglin B, Schwab U, Hübinger A, Gries FA, Kolb H, Bertrams J: Normal values of early insulin and C-peptide secretion after intravenous glucose. *Ärztl Lab* 35:135–38, 1989
18. Koschmann M, Alford FP, Ward GM, Walters J, Colman PG, Harrison LC: Reproducibility of estimating first-phase insulin response to intravenous glucose. *Diab Nutr Metab* 5:73–79, 1992
